# Supplementary material for: Two Novel Amyloid Proteins, RopA and RopB, from the Root Nodule Bacterium Rhizobium leguminosarum
Source: MDPI journal article supplement (doi:10.3390/biom9110694), 2019-11-04
Supplement: s1 [file s1]

**Table S1:** List of primers used in this work.

| Primer    | Sequence 5'-3'                              |
|-----------|---------------------------------------------|
| FHindRopA | TACCAAGCTTATGGCAGATGCGATTGTTGCAG            |
| RBglRopA  | ATGAAGATCTGAAGCTGATGGTGGTGCTG               |
| FHindRopB | TACCAAGCTTATGGCAGATCGTGTGGATCAGG            |
| RBamRopB  | AGATGGATCCGAACTTCACGCCAATGCCAAGT            |
| FAlicRopA | AGAAGGAGATATAACTATGGCAGATGCGATTGTTGCAG      |
| RAlicRopA | GTGGTGGTGATGGTGATGGCCGAAGCTGATGGTGGTGCTG    |
| FAlicRopB | AGAAGGAGATATAACTATGGCAGATCGTGTGGATCAGG      |
| RAlicRopB | GTGGTGGTGATGGTGATGGCCGAACTTCACGCCAATGCCAAGT |
