# Supplementary material for: Two Novel Amyloid Proteins, RopA and RopB, from the Root Nodule Bacterium Rhizobium leguminosarum
Source: MDPI journal article supplement (doi:10.3390/biom9110694), 2019-11-04
Supplement: s1 [file s1]

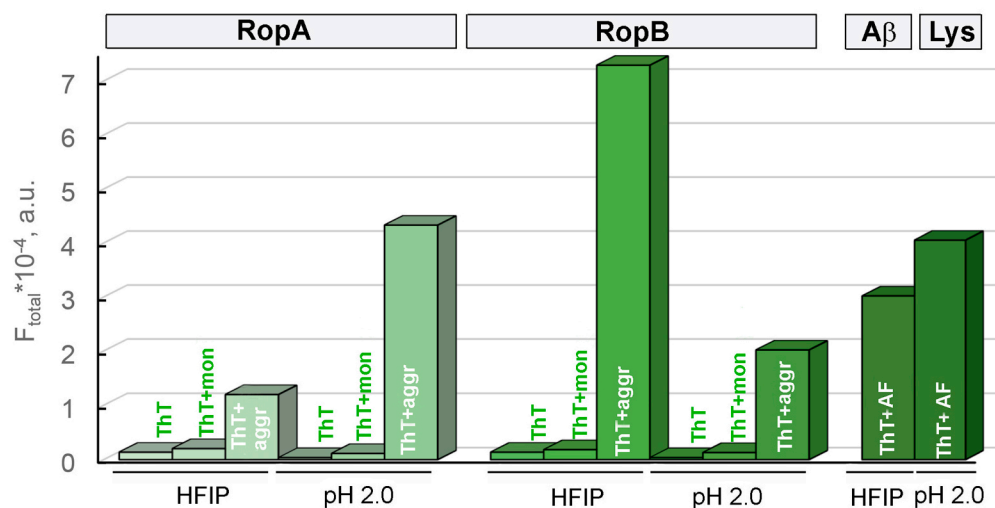

**Figure S3.** Fluorescence of ThT bound to RopA and RopB in monomeric and aggregated states. Figure shows corrected on the primary inner filter effect total fluorescence intensity of ThT in free state (ThT) in the conditions of fibrillogenesis (HFIP/water mixture (HFIP) and buffer with acidic pH 2.0, in the presence of RopA and RopB in monomeric (ThT+mon) and aggregated (ThT+aggr) states, in the presence of A $\beta$ -peptide (1-42 aa) and lysozyme amyloid fibrils (ThT+AF) prepared using HFIP and acidic solution, respectively.
