# Supplementary material for: Two Novel Amyloid Proteins, RopA and RopB, from the Root Nodule Bacterium Rhizobium leguminosarum
Source: MDPI journal article supplement (doi:10.3390/biom9110694), 2019-11-04
Supplement: s1 [file s1]

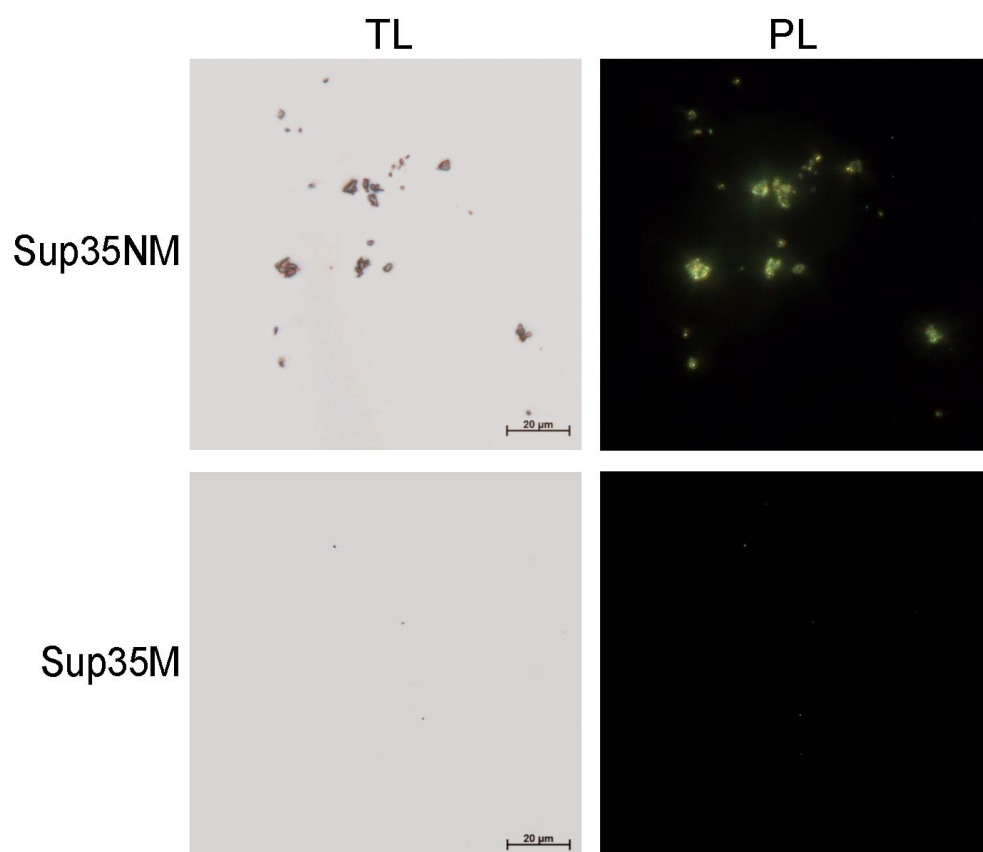

**Figure S4.** Polarized light microscopy of the CR-stained Sup35NM and Sup35M samples. TL – transmitted light, PL – polarized light. Scale bar is equal to 20  $\mu\text{m}$ .
