# Supplementary material for: Two Novel Amyloid Proteins, RopA and RopB, from the Root Nodule Bacterium Rhizobium leguminosarum
Source: MDPI journal article supplement (doi:10.3390/biom9110694), 2019-11-04
Supplement: s1 [file s1]

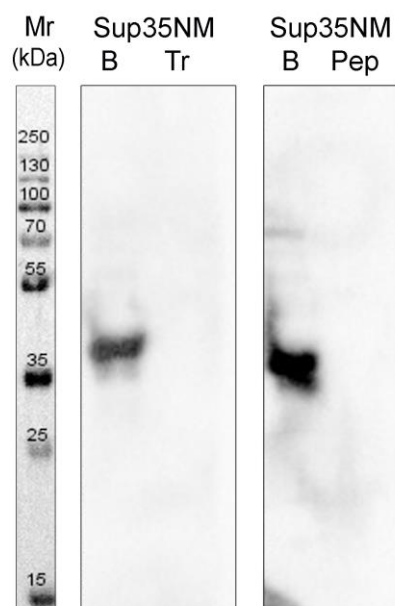

**Figure S5.** Analysis of the protease resistance of the Sup35NM protein obtained *in vitro* at the initial point of incubation by western-blot. B – samples boiled with 2% SDS; T – treated with trypsin and boiled with 2% SDS; P – treated with pepsin and boiled with 2% SDS. Corresponding molecular weights (kDa) are indicated.
