# Supplementary material for: Two Novel Amyloid Proteins, RopA and RopB, from the Root Nodule Bacterium Rhizobium leguminosarum
Source: MDPI journal article supplement (doi:10.3390/biom9110694), 2019-11-04
Supplement: s1 [file s1]

**A**

Outer membrane protein IIIA OS=Rhizobium leguminosarum bv. viciae GN=ropA PE=1 SV=1 OM3A\_RHILV MH+ (mono): 1.008 MH+ (avg): 1.008 Tolerance (Da): 5.500 Number of Peaks: 909

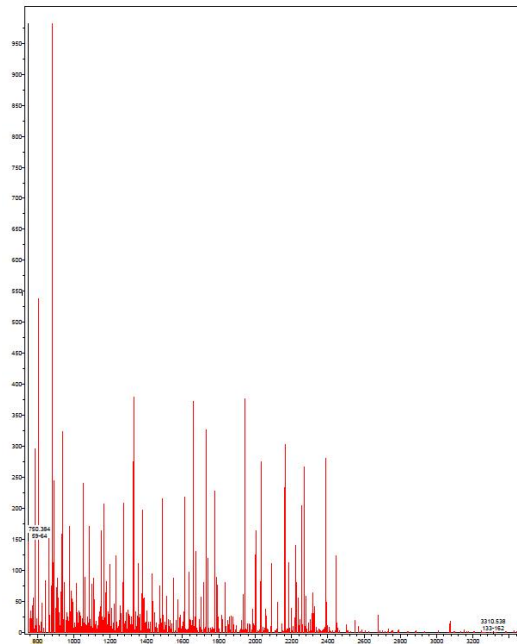

MNIRMVLLASAAFAASTPVLAADAIVAAEPEPVEYVRVCDAYGTGYFYIPGTETCLK**IEGYIR**FQVNVGDNPGGDNDSDWDAVTAVRFSSRKSDTE YGPLTGVIVMQFNADNASDQDAILDSAYLDVAGFR**AGLFYSWWDDGLSGETDDIGSVVTLHNSIR**YQYESGTFYAGLSVDELEDGVYQGTFTPGVI PGTTDFTADDGPNNVGVAFGIGGTAGAFSYQVTGGWDVDNEDGAIRAMGTVEIGPGTFGLAGVYSSGPNYSYSSAEWAVAAEYAIKATDKLKITPGR WHGHVPEDFDGLGDAWKVGLTVDYQIVENFYAKASVQYLPQDGEDSTSGYFACSVRSNHLVDAPGLRIGSTTISF

**B**

22 kDa outer membrane protein OS=Rhizobium leguminosarum bv. viciae GN=ropB PE=3 SV=1 ROPB\_RHILV MH+ (mono): 1.008 MH+ (avg): 1.008 Tolerance (Da): 5.500 Number of Peaks: 909

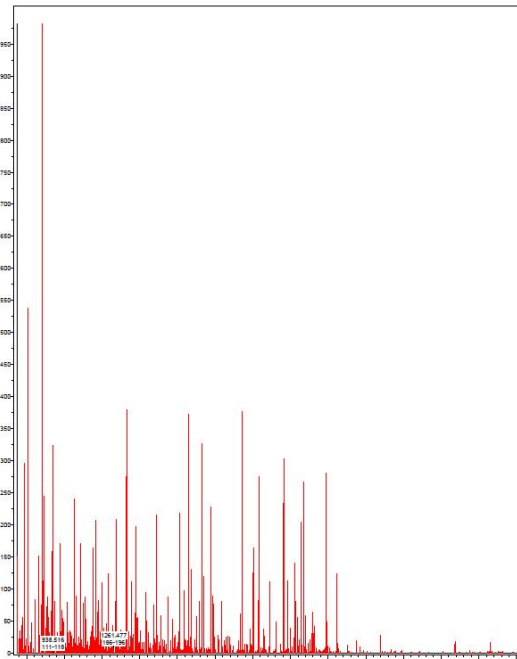

MRVLIAGLMASVFAIAGVSAQAADRVDQVPEAPVAQEAPVKPAGSWEGFYLGGAGTYNMGDFGSDRHTYGFGGQVFTGYNWQQGQIVYGVESD LGYSGDDVSSGGVENK**YGNWSVR**GRVGYDMNPFLLYGTAGLAIGDVKSDDTSDESKTNFGYTVGAGVEAFVTNNITRLEYRYTDYQSK**DYDL****SGSF**RGYDENSVKLGICVKF

**Figure S1.** Mass spectrometry identification data of the RopA (OmpIIIA) (A) and RopB (B) proteins. Amino acid sequences of the RopA (A) and RopB (B) proteins are shown. Peptides identified by mass spectrometry are indicated in yellow.
