# Supplementary material for: Two Novel Amyloid Proteins, RopA and RopB, from the Root Nodule Bacterium Rhizobium leguminosarum
Source: MDPI journal article supplement (doi:10.3390/biom9110694), 2019-11-04
Supplement: s1 [file s1]

**Table S2:** Proteins identified in detergent resistant fraction of *R. leguminosarum*

| Gene         | Protein                                                          | Accession <sup>1</sup> | Score <sup>2</sup> | Mw <sup>3</sup> | pI <sup>4</sup> | Sc <sup>5</sup> | Np <sup>6</sup> | Location <sup>7</sup> |
|--------------|------------------------------------------------------------------|------------------------|--------------------|-----------------|-----------------|-----------------|-----------------|-----------------------|
| <i>ropA</i>  | Outer membrane protein IIIA                                      | OM3A_RHILV             | 172.6              | 39.1            | 3.9             | 9.8             | 2               | M                     |
| <i>rpoB</i>  | DNA-directed RNA polymerase subunit beta                         | RPOB_RHIL3             | 93.9               | 153.6           | 4.9             | 12.5            | 16              | C                     |
| <i>mutS</i>  | DNA mismatch repair protein MutS                                 | MUTS_RHIL3             | 67.5               | 98.6            | 5.3             | 13.7            | 10              | C                     |
| <i>acdS</i>  | 1-aminocyclopropane-1-carboxylate deaminase                      | 1A1D_RHILV             | 65                 | 36.8            | 5.1             | 18.6            | 5               | C                     |
| <i>atpA</i>  | ATP synthase subunit alpha                                       | ATPA_RHIL3             | 63.1               | 54.8            | 6               | 18.9            | 8               | M                     |
| <i>alaS</i>  | Alanine--tRNA ligase                                             | SYA_RHIL3              | 60.6               | 95.4            | 5.2             | 14.1            | 12              | C                     |
| <i>mnmG</i>  | tRNA uridine 5-carboxymethylaminomethyl modification enzyme MnmG | MNMG_RHIL3             | 58.9               | 67.9            | 5.7             | 16.5            | 8               | C                     |
| <i>gltX</i>  | Glutamate--tRNA ligase                                           | SYE_RHIL3              | 56.8               | 55.1            | 5.7             | 25.8            | 10              | C                     |
| <i>katG</i>  | Catalase-peroxidase                                              | KATG_RHIL3             | 55.3               | 79.7            | 5.4             | 6.9             | 3               | C                     |
| <i>groL1</i> | 60 kDa chaperonin 1                                              | CH601_RHIL3            | 55.1               | 57.9            | 4.9             | 24.9            | 10              | C                     |
| <i>tsf</i>   | Elongation factor Ts                                             | EFTS_RHIL3             | 53.9               | 32.2            | 4.9             | 20.8            | 7               | C                     |
| <i>glnD</i>  | Bifunctional uridylyltransferase/uridylyl-removing enzyme        | GLND_RHILV             | 51.5               | 106.7           | 6.9             | 9.5             | 8               | C                     |
| <i>dnaK</i>  | Chaperone protein DnaK                                           | DNAK_RHIL3             | 51.1               | 68.5            | 4.7             | 22.6            | 11              | C                     |
| <i>infB</i>  | Translation initiation factor IF-2                               | IF2_RHIL3              | 50.7               | 99.6            | 7.9             | 8.8             | 7               | C                     |
| <i>trmD</i>  | tRNA (guanine-N(1)-)-methyltransferase                           | TRMD_RHIL3             | 50.2               | 26.6            | 5.8             | 30.3            | 5               | C                     |
| <i>hslV</i>  | ATP-dependent protease subunit HslV                              | HSLV_RHIL3             | 47.3               | 18.7            | 5.7             | 24.6            | 7               | C                     |
| <i>ilvD</i>  | Dihydroxy-acid dehydratase                                       | ILVD_RHIL3             | 46.4               | 66              | 5.7             | 24.7            | 10              | C                     |
| <i>argG1</i> | Argininosuccinate synthase 1                                     | ASSY1_RHIL3            | 45.7               | 44.4            | 5.6             | 17.9            | 9               | C                     |
| <i>RL450</i> | UPF0235 protein RL4503                                           | Y4503_RHIL3            | 45.5               | 11.1            | 9.7             | 62.1            | 6               | N. d.                 |

| Gene         | Protein                                                               | Accession <sup>1</sup> | Score <sup>2</sup> | Mw <sup>3</sup> | pI <sup>4</sup> | Sc <sup>5</sup> | Np <sup>6</sup> | Location <sup>7</sup> |
|--------------|-----------------------------------------------------------------------|------------------------|--------------------|-----------------|-----------------|-----------------|-----------------|-----------------------|
| <i>ispDF</i> | Bifunctional enzyme<br>IspD/IspF                                      | ISPDF_RHIL3            | 44.6               | 43.5            | 6               | 11.6            | 5               | N. d.                 |
| <i>modC</i>  | Molybdenum import<br>ATP-binding protein<br>ModC                      | MODC_RHIL3             | 42.8               | 38.8            | 7.9             | 14.6            | 4               | M                     |
| <i>rpoC</i>  | DNA-directed RNA<br>polymerase subunit<br>beta'                       | RPOC_RHIL3             | 42.3               | 156.3           | 6.6             | 10              | 13              | C                     |
| <i>prfA</i>  | Peptide chain release<br>factor 1                                     | RF1_RHIL3              | 41.4               | 40              | 4.9             | 28.7            | 8               | C                     |
| <i>miaB</i>  | (Dimethylallyl)adenosin<br>e tRNA<br>methylthiotransferase<br>MiaB    | MIAB_RHIL3             | 40                 | 53.2            | 5.7             | 17.3            | 8               | C                     |
| <i>rplA</i>  | 50S ribosomal protein<br>L1                                           | NDVA_RHIL3             | 39.6               | 24.1            | 10.1            | 29.2            | 6               | C                     |
| <i>ndvA</i>  | Beta-(1-->2)glucan<br>export ATP-<br>binding/permease<br>protein NdvA | RL1_RHIL3              | 39.6               | 64.8            | 9.1             | 10.2            | 5               | M                     |
| <i>xseA</i>  | Exodeoxyribonuclease 7<br>large subunit                               | EX7L_RHIL3             | 39.2               | 57.4            | 10.4            | 18.6            | 8               | C                     |
| <i>glsA</i>  | Glutaminase                                                           | GLSA_RHIL3             | 37.8               | 33.1            | 6.9             | 19.4            | 5               | C                     |
| <i>pyrD</i>  | Dihydroorotate<br>dehydrogenase<br>(quinone)                          | PYRD_RHIL3             | 37.4               | 38.9            | 9.4             | 11.3            | 4               | M                     |
| <i>fhs</i>   | Formate--<br>tetrahydrofolate ligase                                  | FTHS_RHIL3             | 36.5               | 60.2            | 6.8             | 11.8            | 5               | C                     |
| <i>groL</i>  | 60 kDa chaperonin                                                     | CH60_RHILV             | 35.9               | 57.8            | 5               | 25.5            | 10              | C                     |
| <i>recA</i>  | Protein RecA                                                          | RECA_RHILV             | 35.6               | 37.8            | 5.2             | 21.9            | 5               | C                     |
| <i>rbsA1</i> | Ribose import ATP-<br>binding protein RbsA 1                          | RBSA1_RHIL3            | 35.5               | 55.9            | 6.8             | 17              | 7               | M                     |
| <i>rplI</i>  | 50S ribosomal protein<br>L9                                           | RL9_RHIL3              | 35.2               | 21.1            | 4.6             | 28.6            | 4               | C                     |
| <i>glyS</i>  | Glycine--tRNA ligase<br>beta subunit                                  | SYGB_RHIL3             | 35                 | 77.3            | 5.6             | 9.9             | 6               | C                     |
| <i>proB</i>  | Glutamate 5-kinase                                                    | PROB_RHIL3             | 34.8               | 40.9            | 9.4             | 13.9            | 5               | C                     |
| <i>rbsA2</i> | Ribose import ATP-<br>binding protein RbsA 2                          | RBSA2_RHIL3            | 34.5               | 55.6            | 6.4             | 12.9            | 7               | M                     |

| Gene         | Protein                                                          | Accession <sup>1</sup> | Score <sup>2</sup> | Mw <sup>3</sup> | pI <sup>4</sup> | Sc <sup>5</sup> | Np <sup>6</sup> | Location <sup>7</sup> |
|--------------|------------------------------------------------------------------|------------------------|--------------------|-----------------|-----------------|-----------------|-----------------|-----------------------|
| <i>ureC</i>  | Urease subunit alpha                                             | URE1_RHIL3             | 34                 | 61              | 5.6             | 4               | 4               | C                     |
| <i>accA</i>  | Acetyl-coenzyme A carboxylase carboxyl transferase subunit alpha | ACCA_RHIL3             | 33.9               | 34.6            | 6.1             | 21.8            | 4               | C                     |
| <i>ruvB</i>  | Holliday junction ATP-dependent DNA helicase RuvB                | RUVB_RHIL3             | 33.9               | 38.4            | 5.3             | 23.7            | 6               | C                     |
| <i>purA</i>  | Adenylosuccinate synthetase                                      | PURA_RHIL3             | 33.6               | 46.6            | 5.4             | 13              | 5               | C                     |
| <i>rplQ</i>  | 50S ribosomal protein L17                                        | RL17_RHIL3             | 33.4               | 15.3            | 11.1            | 21.4            | 5               | C                     |
| <i>rbsA3</i> | Ribose import ATP-binding protein RbsA 3                         | RBSA3_RHIL3            | 32.9               | 55.5            | 6               | 6.2             | 4               | M                     |
| <i>rpsF</i>  | 30S ribosomal protein S6                                         | RS6_RHIL3              | 32.3               | 17.8            | 9.6             | 32.9            | 4               | C                     |
| <i>mutL</i>  | DNA mismatch repair protein MutL                                 | MUTL_RHIL3             | 32                 | 64.6            | 6.3             | 9.7             | 3               | C                     |
| <i>ropB</i>  | 22 kDa outer membrane protein                                    | MASZ_RHILV             | 31.9               | 22.5            | 4.2             | 9               | 2               | M                     |
| <i>glcB</i>  | Malate synthase G                                                | ROPB_RHILV             | 31.9               | 80              | 5.6             | 9.4             | 8               | C                     |
| <i>ttcA</i>  | tRNA 2-thiocytidine biosynthesis protein TtcA                    | TTCA_RHIL3             | 31.5               | 32.8            | 6.9             | 12.1            | 5               | C                     |
| <i>tdh</i>   | L-threonine 3-dehydrogenase                                      | TDH_RHIL3              | 31.2               | 37.8            | 5.9             | 20.9            | 5               | C                     |
| <i>nodT</i>  | Nodulation protein T                                             | NODT_RHILV             | 30.9               | 51.5            | 6.6             | 11.2            | 5               | M                     |
| <i>hypD</i>  | Hydrogenase expression/formation protein HypD                    | HYPD_RHILV             | 30.8               | 42.6            | 6.5             | 6.2             | 3               | C                     |
| <i>betA</i>  | Oxygen-dependent choline dehydrogenase                           | BETA_RHIL3             | 30.8               | 0               | 6.9             | 6.2             | 2               | M                     |
| <i>leuC</i>  | 3-isopropylmalate dehydratase large subunit                      | LEUC_RHIL3             | 30.6               | 51.1            | 5.6             | 19.6            | 8               | C                     |
| <i>groL</i>  | 60 kDa chaperonin                                                | CH60_RHIL3             | 30.5               | 57.3            | 4.9             | 14.2            | 7               | C                     |

<sup>1</sup>UniProt accession number;

<sup>2</sup>MASCOT protein score (index for determining accuracy identification by Mascot software);

<sup>3</sup>Calculated molecular weight. kDa;

<sup>4</sup>Calculated isoelectric point;

<sup>5</sup>Protein sequence coverage (%);

<sup>6</sup>Number of unique peptides matched to mass peaks;

<sup>7</sup>Protein location according to UniProt (<https://www.uniprot.org/>) database (M – membrane, C – cytoplasmic, n.d. – no data).
