# Supplementary material for: Two Novel Amyloid Proteins, RopA and RopB, from the Root Nodule Bacterium Rhizobium leguminosarum
Source: MDPI journal article supplement (doi:10.3390/biom9110694), 2019-11-04
Supplement: s1 [file s1]

**A**

```
1 M A D A I V A A E P E P V E Y V R V C D
1 ATGGCAGATGCGATTGTTGCAGCGGAACCGGAACCGGTGGAGTATGTTTCGTGTGTGCGAT
21 A Y G T G Y F Y I P G T E T C L K I E G
61 GCGTATGGCACTGGCTACTTCTACATTCCAGGCACCGAGACCTGTCTGAAGATTGAAGGC
41 Y I R F Q V N V G D N P G G D N D S D W
121 TACATTTCGCTTTCAGGTGAACGTTGGCGACAATCCAGGTGGCGACAACGATAGCGATTGG
61 D A V T A V R F S S R K S D T E Y G P L
181 GATGCAGTGACTGCGGTTTCGCTTCTCTAGCCGCAAGAGTGATACCGAGTATGGTCCACTG
81 T G V I V M Q F N A D N A S D Q D A I L
241 ACTGGCGTGATTGTGATGCAGTTCAATGCGGATAACGCGAGCGATCAGGATGCGATTCTG
101 D S A Y L D V A G F R A G L F Y S W W D
301 GATTCTGCGTATCTTGATGTTGCAGGCTTTTCGTGCTGGCTTGTTCTATAGCTGGTGGGAT
121 D G L S G E T D D I G S V V T L H N S I
361 GATGGCTTGAGTGGCGAAAACCGATGACATTGGCTCTGTTGTGACCCTGCACAACAGCATT
141 R Y Q Y E S G T F Y A G L S V D E L E D
421 CGCTATCAGTATGAATCAGGCACCTTCTATGCAGGTCTGAGCGTGGATGAAGTGAAGAT
161 G V Y Q G T F T P G V I P G T T D F T A
481 GCGTGTATCAAGGCACCTTTACTCCAGGTGTGATTCCGGGTACCACCGATTTTACTGCG
181 D D G P N N V G V A F G I G G T A G A F
541 GATGATGGTCCGAACAACGTTGGCGTTGCGTTTGGCATCGGTGGCACCGCAGGCGCGTTT
201 S Y Q V T G G W D V D N E D G A I R A M
601 AGCTATCAGGTGACTGGTGGCTGGGATGTGGACAACGAAGATGGCGCGATTTCGTGCGATG
221 G T V E I G P G T F G L A G V Y S S G P
661 GGCACCGTGGAGATTGGTCCAGGCACCTTTGGTCTTGCTGGCGTGTATAGCAGTGGCCCG
241 N S Y Y S S A E W A V A A E Y A I K A T
721 AACAGCTACTATAGCTCAGCGGAATGGGCGGTTGCAGCGGAGTATGCGATCAAAGCGACC
261 D K A L K I T P G R W H G H V P E D F D G
781 GACAAACTGAAGATCACCCAGGTTCGCTGGCATGGCCATGTTCCGGAGGACTTTGATGGC
281 L G A D A W K V G L T V D Y Q I V E N F Y
841 TTAGGCGATGCGTGGAAAGTTGGCCTGACCGTGGACTATCAGATTGTGGAGAAGTTCTAT
301 A K A S V Q Y L D P Q D G E D S T S G Y
901 GCGAAAGCGTCTGTGCAGTATCTGGATCCGCAGGATGGCGAAGATAGCACCAGCGGCTAC
321 F A C S V R S N H L V D A P G L R I G S
961 TTTGCGTGCTCAGTTCGCAGCAACCATCTGGTGGATGCTCCAGGTTTACGCATTGGCAGC
341 T T I S F Stop
1021 ACCACCATCAGCTTCTAA
```

**B**

```
1 M A D R V D Q V P E A P V A Q E A P V K
1 ATGGCAGATCGTGTGGATCAGGTACCGGAAGCACCGGTTGCTCAAGAAGCACCGTGA
21 P A G S W E G F Y L G G A G T Y N M G D
61 CCAGCAGGCAGCTGGGAAGGCTTCTATCTTGGTGGTGTGCTGGCACCTACAACATGGGTGAC
41 F G S D R H T Y G F G G Q V F T G Y N W
121 TTTGGCTCTGATCGTCACACCTATGGCTTTGGAGGTCAGGTGTTCACTGGCTACAACCTGG
61 Q Q A G Q I V Y G V E S D L G Y S G D D V
181 CAGCAAGGCCAGATTGTGTATGGTGTGGAGAGCGATCTTGGCTACAGTGGCGATGATGTG
81 S S G G V E N K Y G W N G S V R G R V G
241 AGCTCTGGTGGAGTGGAGAACAAGTATGGCTGGAATGGCAGCGTTTCGTGGTTCGTGTTGGC
101 Y D M N P F L L Y G T A G L A I G D V K
301 TATGACATGAATCCGTTTCTGCTGTATGGCACTGCAGGCTTAGCGATTGGCGATGTGAAA
121 V S D D T S D E S K T N F G Y T V G A G
361 GTGAGCGATGACACCAGCGATGAGAGCAAGACCAACTTTGGCTATACCGTTGGTGCAGGC
141 V E A F V T N N I T T R L E Y R Y T D Y
421 GTGGAAGCGTTTGTGACCAACAACATCACCCTCGCTTAGAGTATCGCTACACCGACTAT
161 Q S K D Y D L D S G S F S R G Y D E N S
481 CAGAGCAAAGACTATGATCTGGACAGTGGCAGCTTTTCTCGTGGCTATGATGAGAACAGC
181 V K L G I G V K F Stop
541 GTGAAACTTGGCATTGGCGTGAAGTTCTAA
```

**File S1.** Sequences of the *ropA* (A) and *ropB* (B) *R. leguminosarum* genes with the codon usage optimized for expression in *E. coli*.
