# Supplementary material for: Two Novel Amyloid Proteins, RopA and RopB, from the Root Nodule Bacterium Rhizobium leguminosarum
Source: Biomolecules. 2019 Nov 4;9(11):694. doi: 10.3390/biom9110694 (PMC6920782; doi:10.3390/biom9110694)
Supplement: Supplementary file 1 [file biomolecules-09-00694-s001.zip]

Archive with 8 entries (8 files):
- Table S2.pdf
- Fig S1.pdf
- Fig S2.pdf
- Fig S3.pdf
- Fig S4.pdf
- Fig S5.pdf
- File S1.pdf
- Table S1.pdf
